# Supplementary material for: Abiotic stress-induced accumulation of raffinose in Arabidopsis leaves is mediated by a single raffinose synthase (RS5, At5g40390)
Source: PubMed Central journal article supplement (PMC3878221; doi:10.1186/1471-2229-13-218), 2013-12-20
Supplement: 1471-2229-13-218-S1.pdf [file 1471-2229-13-218-S1.pdf]

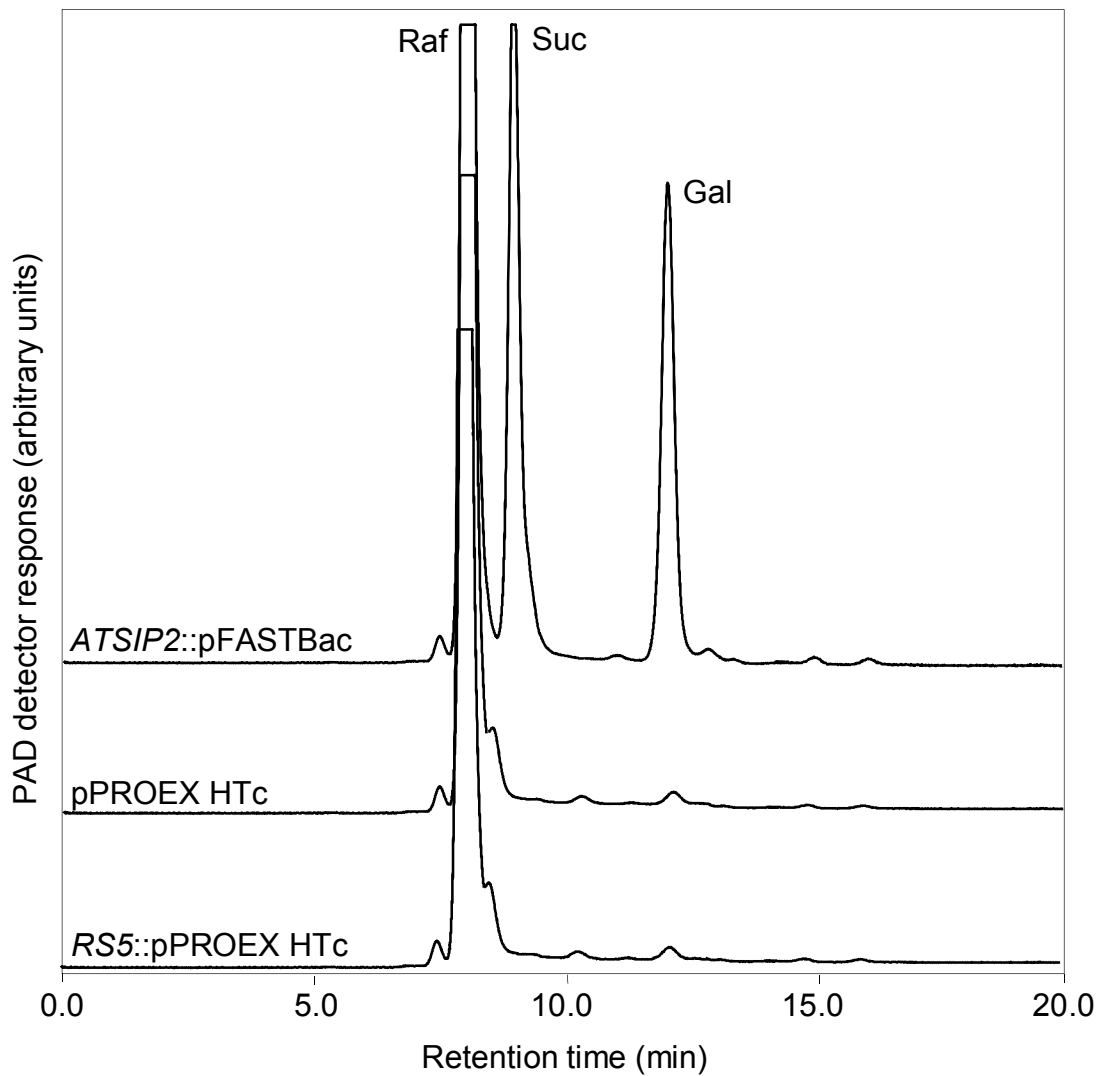

**Supplementary Fig. S1 HPLC-PAD chromatogram testing alkaline  $\alpha$ -galactosidase ( $\alpha$ -Gal) activity in crude extracts from *E. coli* transformed with *RS5::pPROExHTc*.**

Crude extracts were incubated with 50 mM Raf at pH 7.5 for 1 h. Crude extracts (from *Sf9* insect cells) that heterologously expressed *AT5IP2* (At3g57520, Peters et al. 2010) were used as a positive control for  $\alpha$ -Gal activity. Neither the empty vector control, pPROExHTc, nor *RS5::pPROExHTc* showed any  $\alpha$ -Gal activity. Raf, raffinose (8.2 min); Suc, sucrose (9.4 min); Gal, galactose (12.6 min).
